# Supplementary material for: Quercetin/Zinc complex and stem cells: A new drug therapy to ameliorate glycometabolic control and pulmonary dysfunction in diabetes mellitus: Structural characterization and genetic studies
Source: PubMed Central journal article supplement (PMC7932096; doi:10.1371/journal.pone.0246265), 2021-03-04

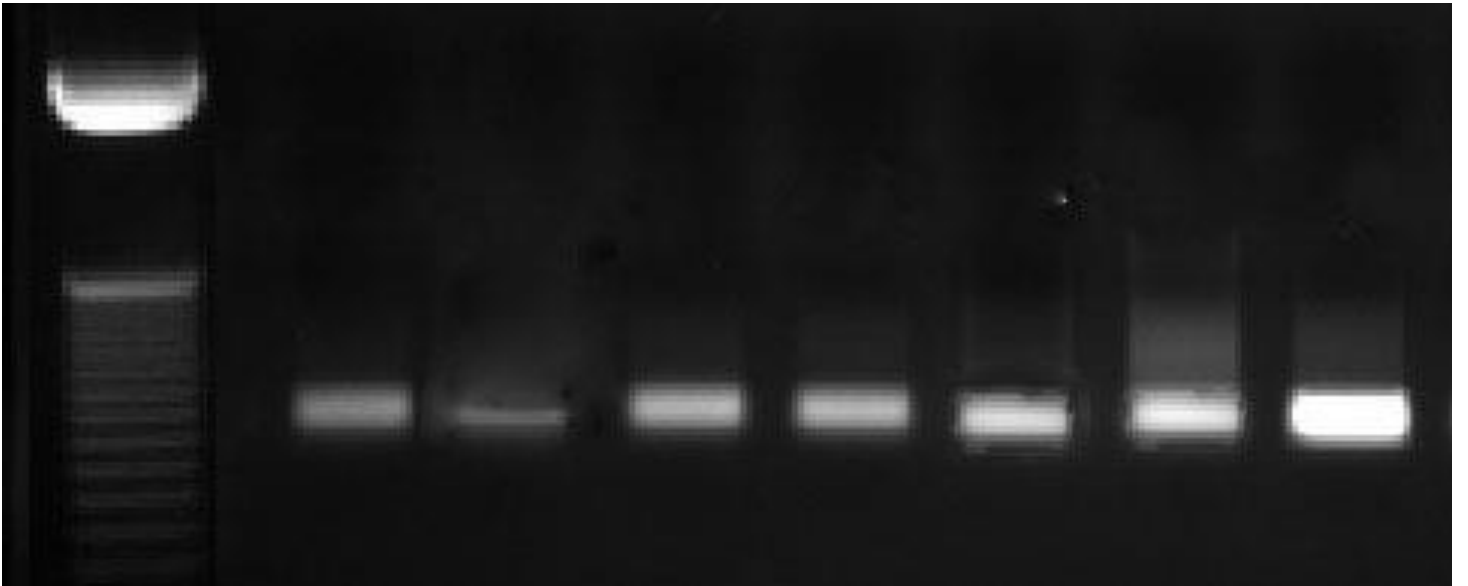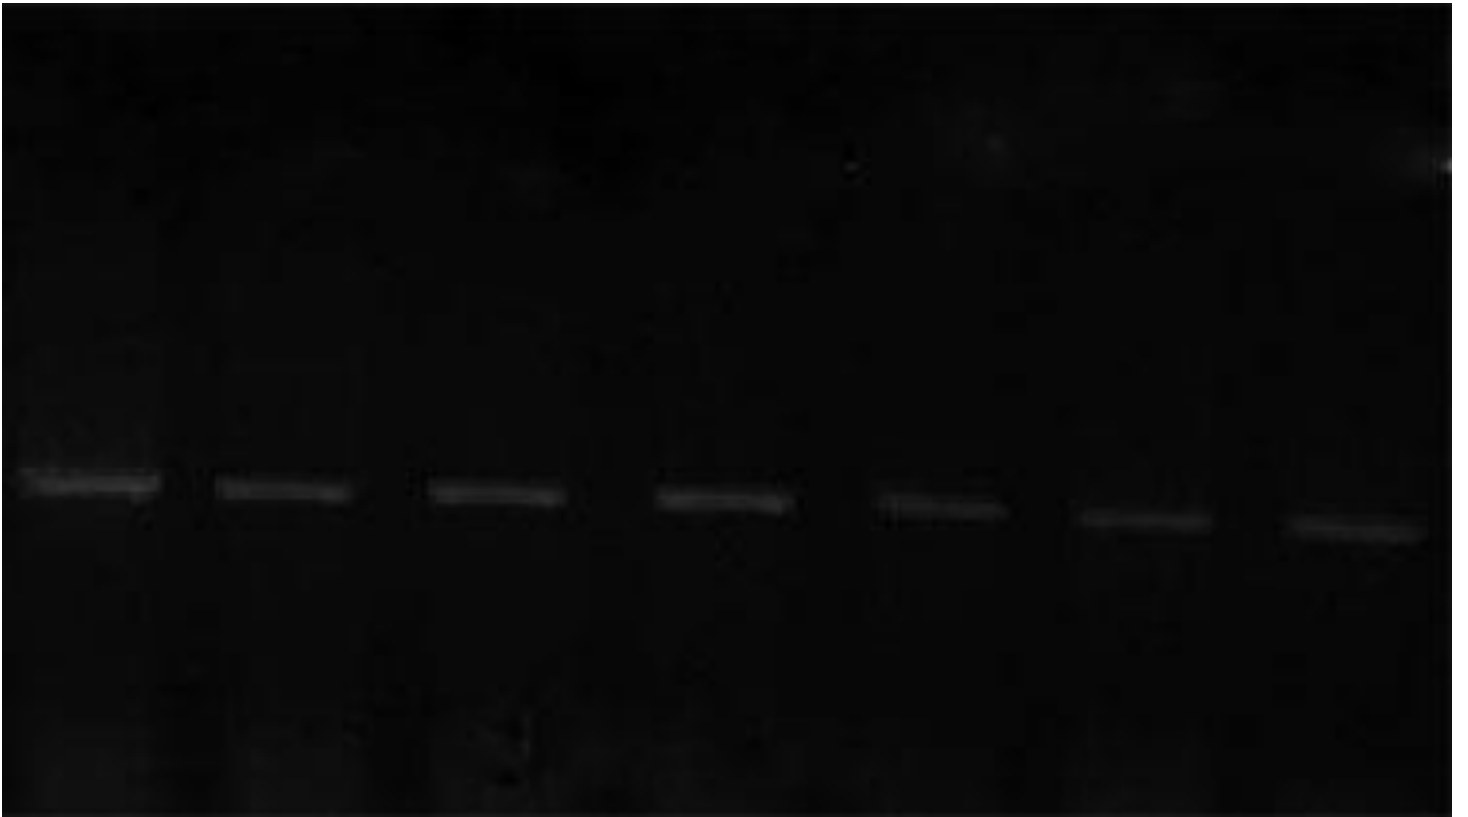

Supplement: pone.0246265.s002.pdf [file pone.0246265.s002.pdf]
